# Supplementary material for: Solution phase chemical synthesis of nano aluminium particles stabilized in poly(vinylpyrrolidone) and poly(methylmethacrylate) matrices
Source: Royal Society of Chemistry journal article supplement (doi:10.1039/b9nr00337a), 2010-01-01

## Supporting information

Solution phase chemical synthesis of nano aluminium particles stabilized in poly(vinylpyrrolidone) and poly(methylmethacrylate) matrices.

G. Sekher Reddy<sup>a</sup> and K. Muralidharan\*<sup>a,b</sup>

Fig. 1: TG--DTA curves of Al/PVP composite before removing lithium chloride

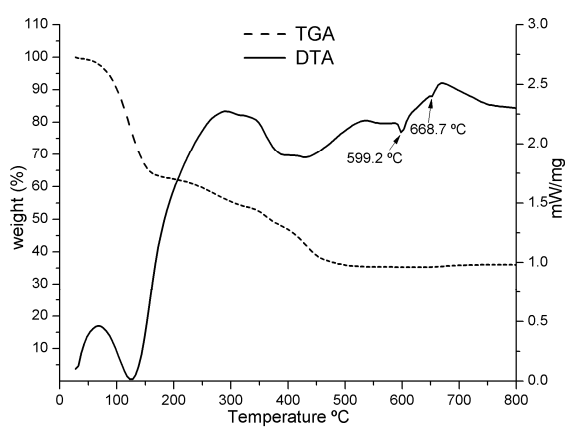

Fig. 2: TG-DTA curves of Al/PVP composite after removing lithium chloride

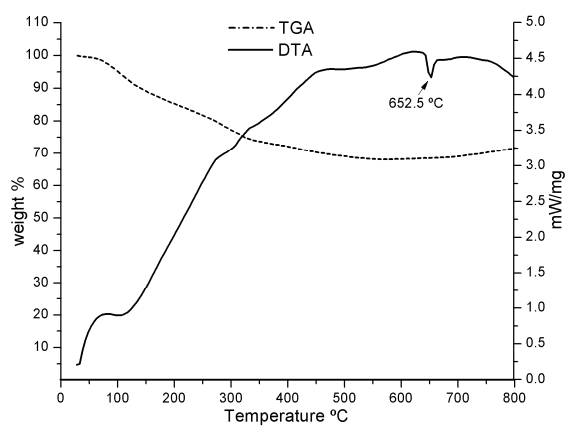

Fig. 3: XRD spectrum of Al/PMMA (1:1) composite

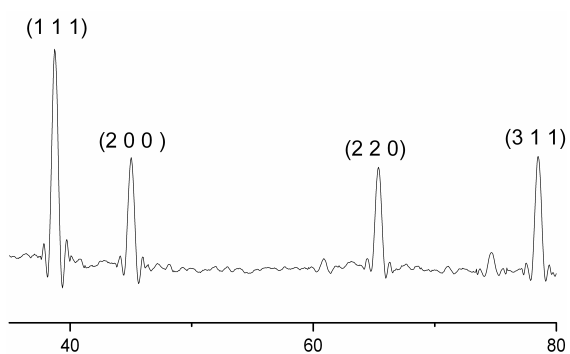

Fig. 4: EDX spectrum of Al/PMMA (1:1) composite

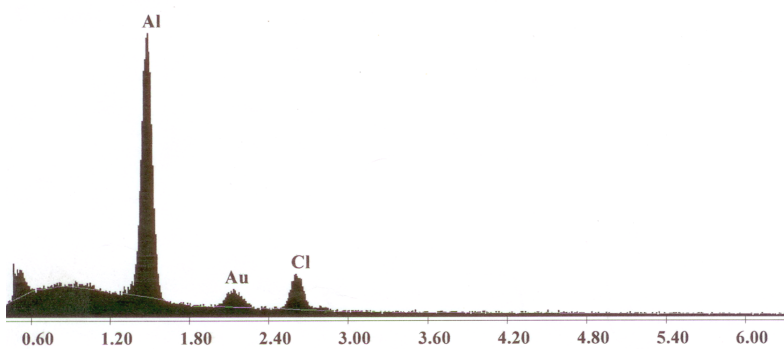

Supplement: b9nr00337a.pdf [file b9nr00337a.pdf]
